# Supplementary material for: Perovskite type oxide-supported Ni catalysts for the production of 2,5-dimethylfuran from biomass-derived 5-hydroxymethylfurfural
Source: Royal Society of Chemistry journal article supplement (doi:10.1039/c6gc00432f), 2016-01-01
Supplement: c6gc00432f1.pdf [file c6gc00432f1.pdf]

**Perovskite Type Oxide Supported Ni Catalysts for  
the Production of 2,5-Dimethylfuran from  
Biomass-Derived 5-Hydroxymethylfurfural**

*Collaborative Innovation Center of Chemistry for Energy Materials  
Anhui Province Key Laboratory of Biomass Clean Energy,  
Department of Chemistry, University of Science and Technology of China,  
Hefei 230026, China. Fax: (+86)-551-63606689*

**Corresponding author: Yao Fu**

E-mail: fuyao@ustc.edu.cn

Table S1 The effect of time on the hydrogenolysis of the reaction intermediates

| Entry | Substrate | t / h | Conv. / % | Yield / % |     |      |     |        |
|-------|-----------|-------|-----------|-----------|-----|------|-----|--------|
|       |           |       |           | DMF       | FDM | MFA  | MF  | Others |
| 1     | FDM       | 4.0   | >99       | 87.2      | 0.1 | 10.4 | -   | 2.3    |
| 2     | FDM       | 2.0   | 98.3      | 62.5      | 1.7 | 33.0 | -   | 2.8    |
| 3     | MF        | 4.0   | >99       | 94.2      | -   | 3.7  | 0.4 | 1.7    |
| 4     | MF        | 2.0   | >99       | 86.9      | -   | 10.9 | 0.7 | 1.5    |
| 5     | MFA       | 4.0   | >99       | 98.1      | -   | 0.8  | -   | 1.1    |
| 6     | MFA       | 2.0   | 97.1      | 93.6      | -   | 2.9  | -   | 3.5    |

Reaction conditions: 1.0 mmol of substrate, 1.0 mmol of n-tetradecane, 100 mg of the LFN-20, 12 ml of ethanol,  $P(\text{H}_2)$ = 5.0 MPa, T= 230 °C; DMF : 2,5-dimethylfuran; FDM : 2,5-furandimethanol; MFA :5-methylfurfuryl alcohol; MF : 5-methylfurfural.

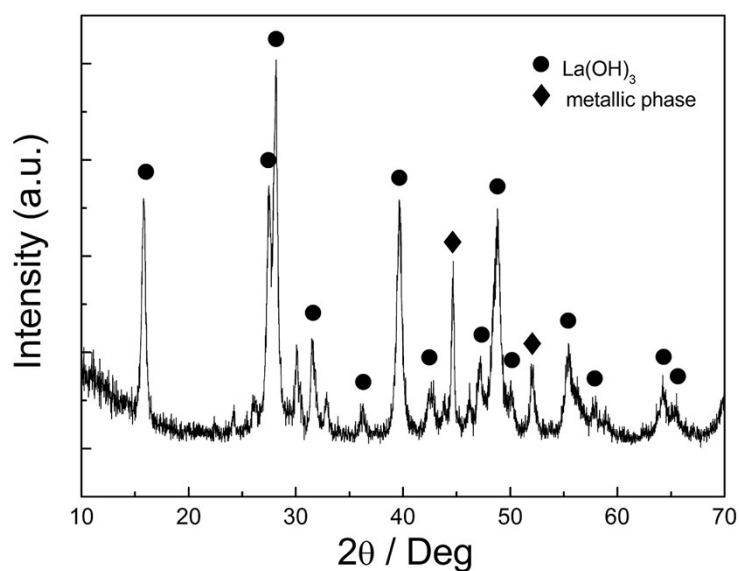

Fig. S1 XRD pattern of lanthanum oxides supported Ni (labeled as L-N20)

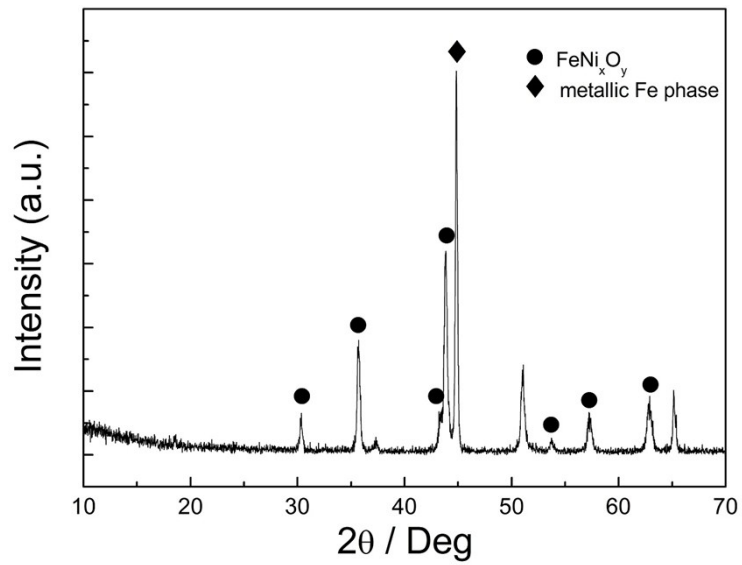

Fig. S2 XRD pattern of iron oxides supported Ni (labeled as F-N20)

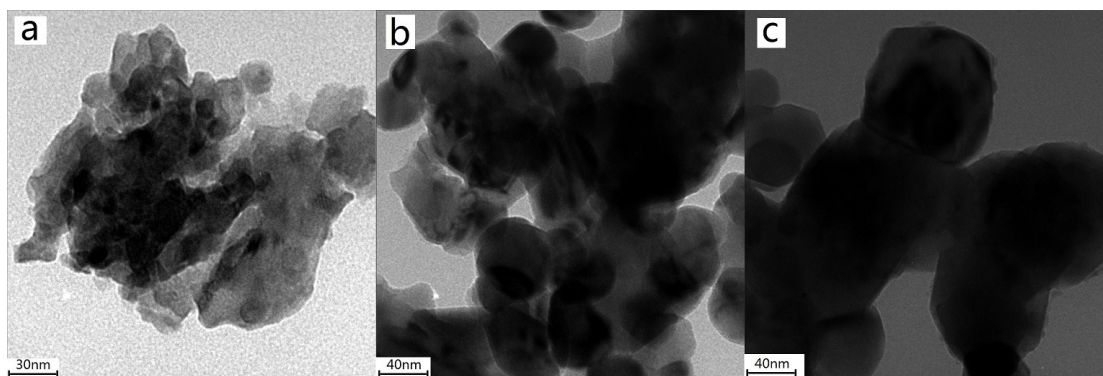

Fig. S3 The TEM images of different supported Ni catalysts (a) L-N20; (b) F-N20; (c) LF.

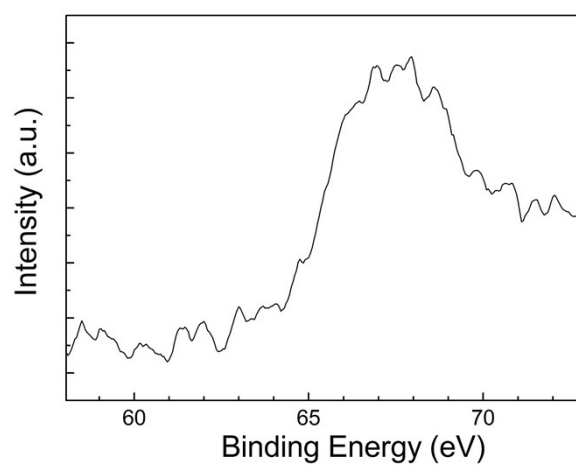

Fig. S4 XPS spectra in the Ni 3p region for L-N20

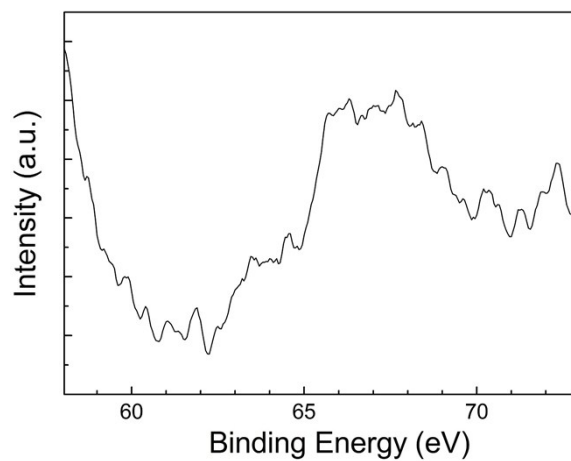

**Fig. S5** XPS spectra in the Ni 3p region for F-N20
